# Supplementary material
Source: Elsevier journal article supplement (https://www.sciencedirect.com/science/article/pii/S2530016419302307)
Supplement: mmc1 [file S2530016419302307:mmc1.docx]

# **Appendix A. Screening models for undiagnosed diabetes in Mexican adults**

## *Appendix A.1. Risk factors questionnaire distributed by the Mexican Secretariat of Health (SSA) [11]*

The questions contained in this risk score are shown in Table A.1. If the sum of the total points is less than 10, then the subject is considered at low risk of having diabetes; otherwise, the subject is considered at high risk of having diabetes.

| **Question** | **Points** |
| --- | --- |
| **According to your BMI, you are ...** |  |
| Normal (≤ 25) | 0 |
| Overweight (> 25 and ≤ 30) | 5 |
| Obese (> 30) | 10 |
| **Waist circumference** |  |
| Female: ≥ 80 cm | 5 |
| Female: < 80 cm | 0 |
| Male: ≥ 90 cm | 5 |
| Male: < 90 cm | 0 |
| **Normally, you do not or barely exercise?** |  |
| Yes | 5 |
| No | 0 |
| **Does any of your siblings have or had diabetes?** |  |
| Yes | 1 |
| No | 0 |
| **Does any of your parents have or had diabetes?** |  |
| Yes | 1 |
| No | 0 |
| **Are you a woman and has given birth to a baby weighing more than 4 kg?** |  |
| Yes | 1 |
| No | 0 |

Table A.1: SSA risk factor questionnaire and score system

## *Appendix A.2. INCMNSZ risk score [9]*

Variables included in the risk score are presented in Table A.2. If the total score is ≥ 21 for females and ≥ 18 for males, then the subject is considered at high risk of having undiagnosed diabetes; otherwise, subjects are classified as healthy.

| **Variable** | **Points** | |
| --- | --- | --- |
| **Age** | **Females** | **Males** |
| < 40 | 0 | 0 |
| 40 -49 | 4 | 6 |
| > 50 | 10 | 7 |
| **Waist circumference**  F: ≥ 93 cm / M: ≥ 100 cm | 5 | 8 |
| **Physically inactive**  Yes | 4 | 5 |
| No | 0 | 0 |
| **BMI**  Normal (≤ 25) | 0 | 0 |
| Overweight (> 25 and ≤ 30) | 7 | 1 |
| Obese (> 30) | 12 | 5 |
| **Sibling or parent with diabetes**  Yes | 4 | 4 |
| No | 0 | 0 |
| **Hypertension**  Yes | 4 | 0 |
| No | 0 | 0 |

Table A.2: Risk score by Rojas et al. [9] and score system

## *Appendix A.3. NHNS 2006 and 2012 models [10]*

The NHNS 2006 and 2012 models are, as the NHNS 2016 model, based on Eq. 1 (see the main text), only with differences in the explanatory variables, models parameters (α and β*i*) and the optimum cutoff probability value (CPV). Explanatory variables and model parameters for the NHNS 2006 and 2012 models are shown in Tables A.3 and A.4. These models, as the NHNS 2016 model, are implemented as follows: first, the probability is calculated using Eq. 1. Then, if the probability obtained is greater or equal the cutoff probability value, the subject is at high risk of having undiagnosed diabetes; otherwise, the subject is considered as normal.

| **Variable** | **β coefficient (± SE)** |
| --- | --- |
| α | -6.52 (± 0.51) |
| Age (y) | 0.021 (± 0.005) |
| Waist circumference (cm) | 0.006 (± 0.003) |
| SBP (mmHg) | 0.012 (± 0.004) |
| CPV | 0.027 |

Table A.3: Explanatory variables included in the NHNS 2006 model and model parameters (± SE)

| Variable | β coefficient (± SE) |
| --- | --- |
| α | -5.30 (± 2.62) |
| Age (y) | 0.017 (± 0.01) |
| Waist circumference (cm) | 0.042 (± 0.01) |
| Family history of diabetes (yes: 1, no: 0) | 0.91 (± 0.3) |
| Height (cm) | 0.028 (± 0.01) |
| CPV | 0.010 |

Table A.10: Explanatory variables included in the NHNS 2012 model and model parameters (± SE)
